# Supplementary material
Source: PubMed Central journal article supplement (PMC9342944)
Supplement: 11657_2022_1148_MOESM1_ESM.pdf [file 11657_2022_1148_MOESM1_ESM.pdf]

Patients with a new low-energy hip fracture  
from January 1st, 2005 to December 6th, 2006  
n=506

- Excluded:
- Unclear fracture date (n=3)
  - Age under 18 (n=1)
  - Pathological fractures (n=6)
  - Girdlestone (n=1)
  - Periprosthetic fracture (n=5)
  - High energy fracture (n=4)

n=20

Patients with a new low-  
energy hip fracture  
n=486
